# Supplementary material for: Endurance Swimming Is Related to Summer Lake Survival of Rainbow Trout in a Warm Lake with Avian Piscivores
Source: MDPI journal article supplement (doi:10.3390/fishes8040213), 2023-04-18
Supplement: s1 [file s1]

Table S1. Lake characteristics and fish stocking details for Pete's Pothole (PPH) and Bluey Pothole 2 (BPH) for 2007, 2008 and 2009.

| Lake                                   |                                                                 | Bluey Pothole 2<br>(BPH)<br>01886NICL |           |           | Pete's Pothole<br>(PPH)<br>01909NICL |           |            |
|----------------------------------------|-----------------------------------------------------------------|---------------------------------------|-----------|-----------|--------------------------------------|-----------|------------|
| TDS (mg l <sup>-1</sup> ) <sup>1</sup> |                                                                 | 300-500                               |           |           |                                      |           |            |
| P (mg l <sup>-1</sup> ) <sup>1</sup>   |                                                                 | 15-30                                 |           |           |                                      |           |            |
| Depth (m)                              |                                                                 | 6                                     |           |           | 20                                   |           |            |
| Surface Area (ha)                      |                                                                 | 2                                     |           |           | 4                                    |           |            |
| Predators <sup>2</sup>                 |                                                                 | Kingfisher, merganser                 |           |           | Loon, heron, kingfisher, osprey      |           |            |
| Year                                   |                                                                 | 2007                                  | 2008      | 2009      | 2007                                 | 2008      | 2009       |
| 3N                                     | Total stocked                                                   | 203                                   | 460       | 397       | 600                                  | 479       | 459        |
|                                        | Stocked per endurance quartile (only 50 <sup>th</sup> for 2007) | 88 to 115                             | 65 to 115 | 86 to 115 |                                      | 57 to 110 | 106 to 119 |
|                                        | Transmitters stocked                                            |                                       | 8         |           | 10                                   | 10        |            |
|                                        | Weight (g)                                                      | 19±7                                  | 111±35    | 27±1      | 19±3                                 | 104±34    | 30±1       |
|                                        | Length (mm)                                                     | 119±1                                 | 215±12    | 137±1     | 125±2                                | 208±23    | 138±1      |
|                                        | cf                                                              | 1.1±0.1                               | 1.1±0.1   | 1.0±0.1   | 1.1±0.1                              | 1.1±0.1   | 0.9±0.1    |
| 2N                                     | Total stocked                                                   |                                       | 384       | 400       | 600                                  | 342       | 437        |
|                                        | Stocked per endurance quartile                                  |                                       | 81-130    | 98-104    |                                      | 96-130    | 100-115    |
|                                        | Transmitters stocked                                            |                                       | 11        |           | 10                                   | 10        |            |
|                                        | Average mass stocked (g)                                        |                                       | 102±28    | 29±1      | 20±8                                 | 99±30     | 31±2       |
|                                        | Average length stocked (mm)                                     |                                       | 211±19    | 140±1     | 133±1                                | 208±21    | 140±1      |
|                                        | Average cf stocked                                              |                                       | 1.0±0.1   | 1.0±0.1   | 1.1±0.2                              | 1.1±0.1   | 0.9±0.1    |
| Date stocked                           |                                                                 | May 29                                | May 26    | May 25    | May 29                               | May 26    | May 25     |
| Surface temperature at stocking (°C)   |                                                                 | 15                                    | 16        | 16        | 15                                   | 17        | 17         |
| Depletion Netting Dates                |                                                                 | Oct 15-18                             | Oct 5-8   | Oct 5-8   | Oct 15-18                            | Oct 5-8   | Oct 5-8    |
| July average surface temperature (°C)  |                                                                 | 19±2                                  | 19±2      |           | 21±2                                 | 21±2      |            |
| Peak summer surface temperature (°C)   |                                                                 | 22                                    | 21        |           | 22                                   | 22        |            |

<sup>1</sup> Post et al. 1999; <sup>2</sup> Beckmann et al. 2006; Biro et al. 2006; \*personal observation. TDS: total dissolved solids; P: organic phosphorus; cf: condition factor; July average surface temperature (mean ±1 standard deviation) .

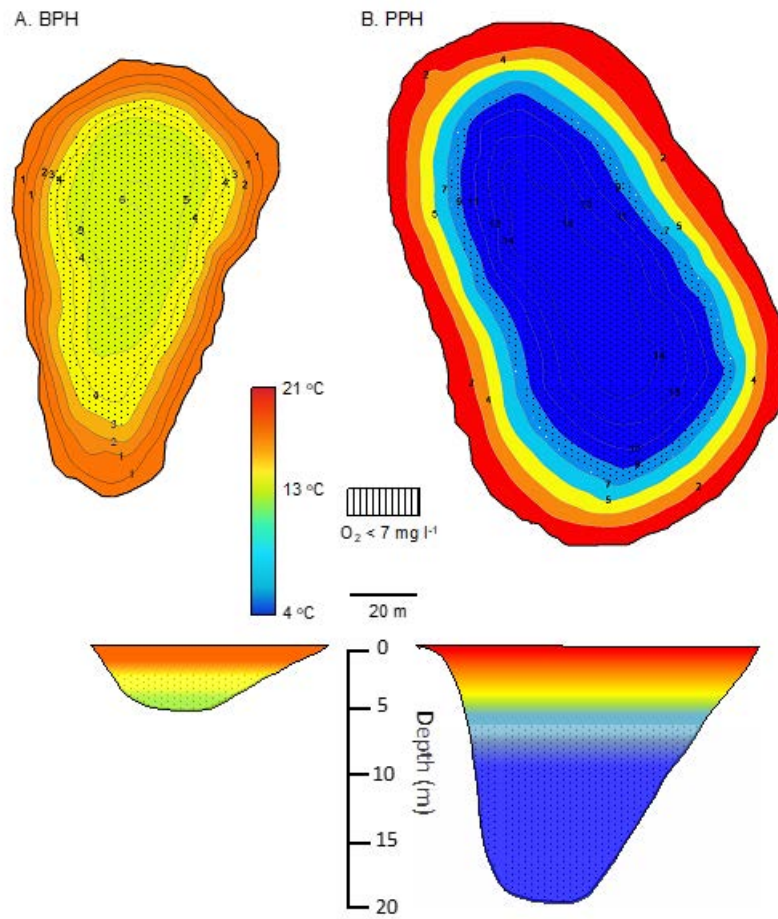

Figure S1. Temperature depth profiles of Bluey Pothole 2 (BPH) (A) and Pete's Pothole (PPH) (B) on July 10, 2008. In top profiles, depth is illustrated with contour lines and numbers delineating depth (m). Bottom profiles are cross sections of lake depth.

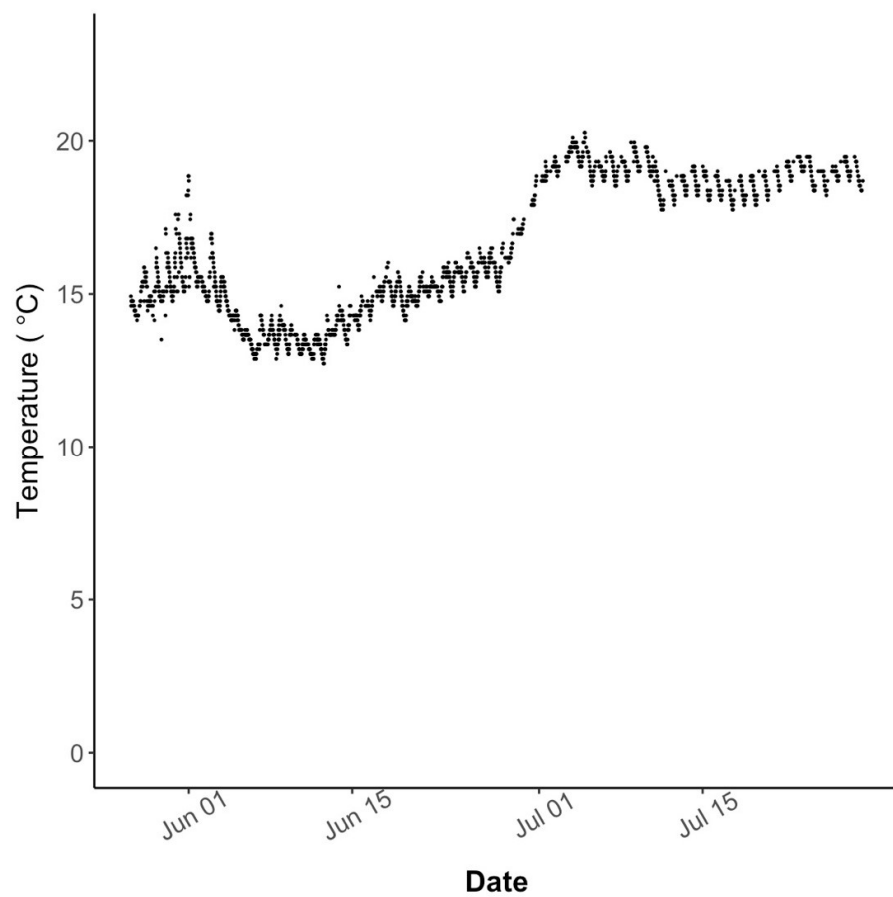

Figure S2. Blue Pothole summer surface temperatures in 2008.
